# Supplementary material for: Bewertung von Qualitätsindikatoren für die Notaufnahme
Source: Springer Nature journal article supplement (doi:10.1007/s10049-016-0236-8), 2016-11-24
Supplement: MOESM3 [file 11095642]

## Tabelle 2:

Zusammenfassung der Ergebnisse aus QUALIFY und der offenen DISKUSSION. Angegeben ist der Prozess, dem der Indikator in der Versorgung zugeordnet wurde sowie seine ursprüngliche ins Deutsche übersetzte Formulierung. Weiterhin sind die Mittelwerte für alle bewerteten QUALIFY-Kriterien, die Feststellung einer Zustimmung im Konsens bzw. Bedenken im Konsens sowie die qualitativen Globalbewertungen der Indikatoren in Gänze (Abk.: CAP: ambulant erworbene Pneumonie / GPCL = German Presenting Complaint List (deutsche Übersetzung der Kanadischen Vorstellungsgrundliste [4] / QI = Qualitätsindikator / ZiK: „Zustimmung im Konsens“ (alle Bewertungen „trifft zu“ oder „trifft eher zu“, resp. „Ja“) BiK: „Bedenken im Konsens“ (alle Bewertungen „trifft nicht zu“ oder „trifft eher nicht zu“, resp. „Nein“) / QUALIFY-Kriterium siehe **Tabelle 1**).

| **Prozess** | **Qualitätsindikator**  **(mit Quelle)** | **QUALIFY-Kriterium** | | | | | | | | | | | | | | **DISKUSSION**  **(Anzahl Kommentare / Diskussionspunkte)** | |
| --- | --- | --- | --- | --- | --- | --- | --- | --- | --- | --- | --- | --- | --- | --- | --- | --- | --- |
| **R1** | **R2** | **R3** | **W2** | **P1** | **P2** | | **P3** | **P4** | **P5** | **P6** | **P7** | **P8** | **P9** |
| Vor Aufnahme |  |  |  |  |  |  |  | |  |  |  |  |  |  |  |  |  |
| Wiedervorstellung, ungeplante | Anteil an ungeplanten Wiedervorstellungen (< 72h) [18, 20, 36, 38, 39, 42] (ID_089) | SCHWÄCHEN MIT PUNKTUELLEN STÄRKEN | | | | | | | | | | | | | | BEDENKEN  Bedenken, da der kritische Fall die Initialbehandlung und nicht die Wiedervorstellung des Patienten ist. In Regionen mit vielen Notaufnahmen ist die Unschärfe zu groß. Kann jedoch in Regionen mit wenigen Notaufnahmen, idealerweise einer einzigen gut angewendet werden. (n = 9) | |
| 3,3 | 3,2 | 2,9 | 3,3 | 3,1 | ZiK  3,9 | | 2,2 | 2,5 | 2,5 | 2,9 | 3,0 | 3,3 | 3,3 |
| Prähospitalphase | Zeitdauer von Ankunft Rettungsdienst bis Abschluss der Übergabe an das ZNA Team [36, 38] (ID_143) | SCHWÄCHEN MIT PUNKTUELLEN STÄRKEN | | | | | | | | | | | | | | BEDENKEN  Es bestehen sowohl Bedenken bei der Datenerhebung (Zusammenführung von prähospitalen Daten der RLS und Klinikdaten bei fehlendem gemeinsamen Zeitgeber. Zweitens ist für eine gute Übergabe nicht die Zeit, sondern deren Inhalt entscheidend. Drittens ist die Zeitdauer der Übergabe von strukturellen Faktoren der Notaufnahme/des KH abhängig. Es besteht Konsens, dass eine strukturierte Übergabe wichtig ist. (n = 12) | |
| 2,4 | 2,8 | 2,3 | 3,4 | 2,8 | 3,6 | 2,9 | | 2,2 | 3,0 | 2,6 | 3,0 | 2,9 | 3,3 |
| Wartebereich und Aufnahme | |  |  |  |  |  |  |  | |  |  |  |  |  |  |  |  |
| Versorgungsabbruch, vorzeitiger | Left without being seen (LWBS) [18, 20, 36, 38, 42] (ID_039) | STÄRKEN MIT PUNKTUELLEN SCHWÄCHEN | | | | | | | | | | | | | | PRÄZISIERUNG  Konsens findet die Formulierung: Anteil an Patienten ohne Erstkontakt ärztlich an allen Patienten mit einem Erstkontakt (n = 7) | |
| 3,2 | 3,2 | 3,3 | ZiK  3,9 | 3,2 | ZiK  3,9 | | 3,1 | 3,2 | 2,3 | 3,5 | 3,5 | 3,5 | 3,3 |
| Ersteinschätzung | Zeitdauer von der Ankunft des Patienten bis zur Ersteinschätzung [7, 38] (ID_148) | STÄRKEN MIT PUNKTUELLEN SCHWÄCHEN | | | | | | | | | | | | | | PRÄZISIERUNG  Konsens findet die Formulierung, das Zeitintervall von Erstkontakt bis Ersteinschätzung zu messen. Weiterhin wird empfohlen, den Anteil der ersteingeschätzten Patienten an allen Patienten der Notaufnahme zu bestimmen. (n = 9) | |
| 3,4 | ZiK  3,6 | 3,3 | ZiK  3,7 | 3,5 | 3,8 | | ZiK  3,7 | 3,0 | 2,8 | 3,2 | 3,3 | 3,5 | 3,5 |
| Interventionen, Ereignisse und Maßnahmen | |  |  |  |  |  |  | |  |  |  |  |  |  |  |  |  |
| Kardiopulmonale Reanimation | Kardiopulmonale Reanimation bei Schwerstverletzten gestartet [39] (ID_013) | STÄRKEN MIT PUNKTUELLEN SCHWÄCHEN | | | | | | | | | | | | | | MODIFIKATION  Um keine Doppeldokumentation zu erzeugen wird empfohlen diesen Indikator über das deutsche Reanimationsregister [17] zu erheben. (n = 16) | |
| 3,2 | 3,1 | 2,4 | 3,4 | 2,5 | 3,8 | | ZiK  3,6 | ZiK  3,2 | 3,4 | 3,3 | ZiK  4,0 | 3,8 | 3,8 |
| Atemwegsmanagement | Anteil intubierter Patienten mit Messung endtidalem CO2 [36] (ID_063) | STÄRKEN ÜBERWIEGEN | | | | | | | | | | | | | | PRÄZISIERUNG  Es wird empfohlen, den Anteil beatmeter Patienten mit Kapnometrie/Kapnographie an allen beatmeten Patienten zu bestimmen. (n = 7) | |
| 3,6 | ZiK  3,7 | 3,6 | ZiK  3,9 | 2,4 | ZiK  3,9 | | ZiK  3,9 | ZiK  3,6 | 3,4 | 3,8 | ZiK  4,0 | ZiK  4,0 | ZiK  4,0 |
| Blutungskontrolle | Massentransfusionsprotokoll verfügbar [30] (ID_040) | STÄRKEN MIT PUNKTUELLEN SCHWÄCHEN | | | | | | | | | | | | | | PRÄZISIERUNG  Trotz geringer Relevanz als gut messbarer Strukturindikator der Notaufnahme wird empfohlen, das Vorhandensein eines gültigen Massentransfusionsprotokolls und einer gültigen Transfusionsanweisung jährlich zu überprüfen. (n = 11) | |
| 2,6 | 3,0 | 3,3 | ZiK  3,8 | 2,3 | 3,8 | | ZiK  3,9 | ZiK  3,8 | 3,3 | 3,3 | ZiK  4,0 | 4,0 | 4,0 |
| EKG | Anteil an Patienten mit akuter zentraler Neurologie, die ein EKG bekommen haben [35] (ID_064) | STÄRKEN ÜBERWIEGEN | | | | | | | | | | | | | | PRÄZISIERUNG  Anteil an Patienten mit den Präsentationssymptomen einer möglichen akuten zentralen Neurologie, die ein EKG bekommen haben. In der GPCL [4] sind dies alle Patienten mit den Codes 401 (veränderter Bewusstseinszustand), 402 (Verwirrtheit), 403 (Schwindel), 404 (Kopfschmerz), 405 (Krampfanfall), 406 (Gangstörung/Ataxie), 409 (Schwäche in den Extremitäten/Symptome eines Schlaganfalls oder TIA).  Hinweis: Es ist anzunehmen, dass weitere Präsentationssymptome existieren, bei denen die Durchführung eines EKG sinnvoll ist. (n = 17) | |
| 3,5 | 3,4 | 3,3 | 3,7 | 2,9 | ZiK  3,9 | | ZiK  3,9 | 3,1 | 3,1 | 3,5 | ZiK  4,0 | ZiK  4,0 | ZiK  4,0 |
| Verschlechterung | Anteil an Patienten mit Intervention bei GCS Abfall [39, 44] (ID_030) | SCHWÄCHEN MIT PUNKTUELLEN STÄRKEN | | | | | | | | | | | | | | BEDENKEN  Bedenken bei der Implementierung: Einerseits ist die Veränderung der Bewusstseinslage ein wichtiger Trigger für Interventionen. Andererseits kann aus Routinedaten nicht sicher ermittelt werden, ob die Intervention aufgrund des GCS Abfalls initiiert wurde. (n = 12) | |
| ZiK  3,6 | ZiK  3,7 | 2,9 | 3,0 | 2,5 | ZiK  3,7 | | ZiK  3,8 | 2,5 | 2,8 | 2,9 | 3,3 | 3,1 | 3,0 |
| Labor- und Point of Care Diagnostik | Zeit bis Abgabe der Blutprobe an das Labor bei Patienten mit akuter zentraler Neurologie (ID_178) | SCHWÄCHEN ÜBERWIEGEN | | | | | | | | | | | | | | PRÄZISIERUNG  Zeit zwischen Erstkontakt und Ergebnis des Gerinnungslabors (INR/TZ/PTT) bei Patienten mit Symptomen einer akuten zentralen Neurologie (GPCL Codes :401 (veränderter Bewusstseinszustand), 402 (Verwirrtheit), 403 (Schwindel), 404 (Kopfschmerz), 405 (Krampfanfall), 406 (Gangstörung/Ataxie), 409 (Schwäche in den Extremitäten/Symptome eines Schlaganfalls oder TIA). (n = 14) | |
| 2,5 | 2,6 | 3,0 | 3,2 | 2,2 | 3,4 | | ZiK  3,8 | 2,1 | 2,5 | 2,9 | 2,6 | 2,9 | 3,2 |
| Medikation | Thromboseprophylaxe bei Traumapatienten [30] (ID_020) | SCHWÄCHEN MIT PUNKTUELLEN STÄRKEN | | | | | | | | | | | | | | BEDENKEN  Wegen großen Unterschieden in der Organisation der Patientenversorgung und dem Patientenkollektiv bestehen Bedenken bei der generellen Einführung als Qualitätsindikator. (n = 14) | |
| 2,4 | 3,1 | 2,7 | 3,6 | 2,8 | 3,5 | | 3,2 | 2,9 | 3,3 | ZiK  3,6 | 3,8 | 4,0 | 3,8 |
| Schmerztherapie | Zeit bis zur ersten Analgetikagabe bei Patienten mit Schmerzen [36] (ID_128) | STÄRKEN MIT PUNKTUELLEN SCHWÄCHEN | | | | | | | | | | | | | | MODIFIKATION  Konsens findet die Formulierung: Zeit zwischen Erstkontakt und Erstgabe eines Analgetikums bei allen Patienten die ein Analgetikum erhalten haben. Weiterhin wird empfohlen den Anteil der Patienten mit Schmerzmessung unter allen ZNA-Patienten zu bestimmen (n = 21) | |
| ZiK  3,7 | ZiK  3,7 | 3,0 | 3,5 | ZiK  3,8 | ZiK  3,9 | | ZiK  3,9 | 2,9 | 3,0 | 3,3 | 3,3 | 3,5 | 3,5 |
| Operative Versorgung | Anteil der Patienten mit offener Tibiafraktur die innerhalb 8 Stunden nach Aufnahme chirurgisch versorgt sind [15] (ID_036) | SCHWÄCHEN MIT PUNKTUELLEN STÄRKEN | | | | | | | | | | | | | | PRÄZISIERUNG  Konsens für die Formulierung: Zeitintervall von Erstkontakt bis OP-Beginn (Schnitt) < 8 Stunden bei Patienten mit offener Tibiafraktur.  Anmerkung: Ggf. wäre das Intervall von Unfallzeitpunkt bis Schnitt besser geeignet (n = 4) | |
| 2,7 | 3,0 | 2,6 | 3,5 | 3,1 | ZiK  3,6 | | 2,7 | 3,0 | 3,1 | 3,3 | ZiK  4,0 | ZiK  4,0 | ZiK  4,0 |
| Zeitmanagement |  |  |  |  |  |  |  | |  |  |  |  |  |  |  |  |  |
| Zeitmanagement allgemein | Dauer des ZNA Aufenthaltes bei stationären Patienten [7, 18, 23, 36, 42] (ID_157) | SCHWÄCHEN MIT PUNKTUELLEN STÄRKEN | | | | | | | | | | | | | | PRÄZISIERUNG  Es besteht Konsens für die Formulierung: Zeitdauer von Erstkontakt bis Behandlungsabschluss.  Interpretiert werden soll nicht die Zeitdauer, sondern der Anteil an Ausreißern über die Standardabweichung, da dies die Fälle sind, bei denen man intervenieren muss. Es dürfen keine Fehlanreize wie in England gesetzt werden, dass es Cut-Off Werte nach oben gibt. (n = 12) | |
| 2,5 | 2,5 | 2,4 | 3,8 | 2,6 | 3,3 | | 2,6 | 3,5 | 3,1 | 3,4 | 3,8 | ZiK  4,0 | ZiK  4,0 |
| Zeitintervall bis Arztkontakt | Zeitintervall von Ankunft des Patienten bis zum ärztlichen Erstkotakt [7, 13, 20, 36, 38, 42] (ID_144) | STÄRKEN ÜBERWIEGEN | | | | | | | | | | | | | | MODIFIKATION  Es besteht Konsens für die Formulierung: Zeitintervall von Erstkontakt bis Erstkontakt ärztlich aufgeschlüsselt nach Ersteinschätzungskategorie, sowie nach nicht-ersteingeschätzten Patienten. (n = 8) | |
| 3,6 | ZiK  3,6 | 3,4 | ZiK  3,9 | 3,5 | 3,9 | | ZiK  3,5 | 3,4 | 3,4 | 3,4 | 3,3 | 3,5 | 3,8 |
|  | Anteil der Patienten die innerhalb ihrer jeweiligen Ersteinschätzungskategorie (Zeit) von einem Arzt gesehen wurden [38] (ID_171) | STÄRKEN ÜBERWIEGEN | | | | | | | | | | | | | | PRÄZISIERUNG  Empfehlung gilt nur für Kliniken, deren Ersteinschätzungssystem mit einer Zeitvorgabe hinterlegt ist. Hier soll der Anteil an Patienten, deren Zeitintervall von Erstkontakt bis Erstkontakt ärztlich innerhalb der jeweiligen Ersteinschätzungsvorgabe liegt, bestimmt werden. (n = 7) | |
| 3,5 | 3,8 | 3,4 | ZiK  3,8 | 3,2 | ZiK  3,8 | | ZiK  3,8 | ZiK  3,5 | 3,7 | 3,4 | 3,8 | ZiK  4,0 | ZiK  4,0 |
| Zeitintervall bis Behandlungsbeginn | Zeit bis Reperfusion bei akutem Myokardinfarkt [20] (ID_136) | STÄRKEN ÜBERWIEGEN | | | | | | | | | | | | | | PRÄZISIERUNG  Es soll getrennt nach systemischer Thrombolyse und Katheterierintervention das Zeitintervall von Erstkontakt bis Beginn der Maßnahmen (Lyse, resp. Punktion zur Katheterintervention) bestimmt werden. Es besteht auch Konsens, dass eine Doppeldokumentation für CPUs und Kliniken, die an einem Herzinfarktregister teilnehmen nicht empfohlen wird. (n = 10) | |
| ZiK  3,6 | ZiK  3,8 | 3,3 | ZiK  3,7 | 3,3 | 3,8 | | 3,0 | 3,1 | 2,8 | ZiK  3,5 | ZiK  4,0 | ZiK  4,0 | ZiK  4,0 |
| Zeitmanagement Röntgen, konventionell | Zeitdauer vom Anordnen des Röntgenbildes bis zur Durchführung [12, 23, 38, 44]  (ID_162) | STÄRKEN MIT PUNKTUELLEN SCHWÄCHEN | | | | | | | | | | | | | | PRÄZISIERUNG  Zeit von Anordnung des Röntgenbildes bis Durchführung bei allen konventionellen Röntgenbildern der Notaufnahme (n = 12) | |
| 2,9 | 2,9 | 2,8 | 3,5 | 3,2 | 3,8 | | 3,1 | 2,8 | 3,0 | 3,3 | 3,5 | 3,8 | 3,8 |
| Zeitmanagement Röntgen, Schnittbildgebung | Zeitintervall bis cCT [12, 30, 39, 44] (ID_149) | STÄRKEN ÜBERWIEGEN | | | | | | | | | | | | | | PRÄZISIERUNG  Zeit von Erstkontakt bis Durchführung cCT bei Patienten, die ein cCT bekommen haben. Es wird erkannt, dass mit diesem Qualitätsindikator nur generelle Aussagen über die Organisation der Abläufe erstellt werden können. Die Versorgung zeitkritischer Fälle wird nicht betrachtet (n = 13). | |
| ZiK  3,8 | ZiK  3,7 | 3,0 | ZiK  3,9 | ZiK  3,5 | ZiK  3,9 | | ZiK  3,5 | ZiK  3,3 | 2,8 | ZiK  3,7 | ZiK  4,0 | ZiK  4,0 | ZiK  4,0 |
| Behandlungsabschluss und Weiterversorgung | |  |  |  |  |  |  | |  |  |  |  |  |  |  |  |  |
| Aufnahme | Stationäre Aufnahmequote [7] (ID_050) | SCHWÄCHEN MIT PUNKTUELLEN STÄRKEN | | | | | | | | | | | | | | BEDENKEN  In der aktuellen Formulierung ausschließlich als interne Kennzahl eines Krankenhauses zu verwenden. Zur Messung von Qualität wird erwogen, Subgruppen mit bestimmten Präsentationssymptomen einzuschließen. (n = 28) | |
| 2,5 | 2,5 | 1,3 | ZiK  3,9 | 3,0 | 3,4 | | 2,9 | ZiK  4,0 | 3,1 | 3,9 | ZiK  4,0 | ZiK  4,0 | ZiK  4,0 |
| Verlegung | Anteil aus der Notaufnahme weiterverlegter Patienten [38] (ID_025) | SCHWÄCHEN ÜBERWIEGEN | | | | | | | | | | | | | | BEDENKEN  Bedenken, da keine Relevanz für die Qualität der Versorgung. Dieser Indikator kann ggf. als Strukturparameter des Individuellen Krankenhauses gewertet werden, um Änderungen zu detektieren. Ob diese aber als positive oder negative Veränderung gewertet werden muss, kann nur das individuelle Haus entscheiden. Zur Messung von Qualität wird erwogen, Subgruppen mit bestimmten Präsentationssymptomen einzuschließen (n = 5) | |
| 2,5 | 2,1 | 1,8 | 3,5 | 2,5 | 3,2 | | 2,9 | 3,6 | 3,1 | 3,5 | ZiK  4,0 | ZiK  4,0 | 3,8 |
| Krankenhausaufenthalt | Krankenhausaufenthalt von stationären Patienten aus der Notaufnahme [15, 24, 29, 38](ID_153) | SCHWÄCHEN MIT PUNKTUELLEN STÄRKEN | | | | | | | | | | | | | | BEDENKEN  Dieser Indikator kann ggf. als Strukturparameter des individuellen Krankenhauses gewertet werden, um Änderungen zu detektieren. Ob diese aber als positive oder negative Veränderung gewertet werden muss, kann nur das individuelle Haus entscheiden. Zur Messung von Qualität wird erwogen, Subgruppen mit bestimmten Präsentationssymptomen einzuschließen. (n = 13) | |
| 2,7 | 2,3 | 1,8 | ZiK  3,7 | 2,5 | 3,4 | | 1,4 | ZiK  3,8 | 3,1 | 3,9 | ZiK  4,0 | ZiK  4,0 | ZiK  4,0 |
| Beschwerdebilder und Tracerdiagnosen | | | | | | | | | | | | | | | | | |
| Tracerdiagnose: Schwerstverletzter Patient | Behandlung Schwerstverletzter (ISS 16-75) im Schockraum [37] (ID_102) | STÄRKEN ÜBERWIEGEN | | | | | | | | | | | | | | PRÄZISIERUNG  Obwohl physiologische Parameter vermutlich besser geeignet wären, besteht Konsens, den Indikator mit der Anmerkung „im Schockraum durch ein interdisziplinäres Team“ zu übernehmen (n = 12) | |
| 3,8 | 3,8 | 3,4 | 3,9 | 3,4 | 3,9 | | 3,8 | 3,5 | 3,7 | 3,8 | 4,0 | 4,0 | 3,8 |
| Tracerdiagnose: Wirbelsäulentrauma | Patienten RX HWS oder geeigneter klinischer Untersuchung bei HWS Trauma [39] (ID_028) | SCHWÄCHEN MIT PUNKTUELLEN STÄRKEN | | | | | | | | | | | | | | BEDENKEN  Es besteht zwar Konsens, dass es sich um einen fachlich relevanten Indikator handelt. Jedoch ist aktuell keine Möglichkeit ersichtlich, wie der Indikator mit vertretbarem Aufwand bestimmt werden könnte. (n = 12) | |
| 2,7 | 3,0 | 2,5 | 3,1 | 2,6 | ZiK  3,5 | | 3,5 | 2,4 | 3,0 | 2,8 | 3,5 | 3,3 | 3,8 |
| Tracerdiagnose: Infektion | Zeit bis zur Erstgabe eines Antibiotikums bei Patienten mit einer schweren Infektion [20] (ID_115) | STÄRKEN ÜBERWIEGEN | | | | | | | | | | | | | | PRÄZISIERUNG  Zeit bis zur Erstgabe eines Antibiotikums bei Patienten mit einer schweren Infektion (Definition: klinischer Verdacht auf Infektion und qSOFA > 1 Punkt [38]). Der Verdacht, dass es sich um eine Infektion handelt, wird durch die Gabe des Antibiotikums definiert.  Anmerkung: Patienten mit schwerer Infektion, welche übersehen werden, sind durch diese Definition nicht erfasst. Hier wäre es besser nicht die Zeit, sondern die Gabe an sich abzufragen [3, 21, 26] (n = 13). | |
| ZiK  3,9 | ZiK  3,9 | 3,1 | ZiK  3,5 | 3,7 | ZiK  3,9 | | ZiK  3,9 | 2,9 | 3,1 | 3,5 | 3,5 | 4,0 | 3,5 |
|  | Anamneserhebung bezüglich multiresistenter Keime (ID_177) | STÄRKEN ÜBERWIEGEN | | | | | | | | | | | | | | BEDENKEN  Da kein Konsens der Formulierung erzielt werden kann bestehen Bedenken. Weiterhin wird festgestellt, dass es sich hierbei um eine Aufgabe des Krankenhaus Hygienikers / Hygienebeauftragten Arzt handelt (n = 9). | |
| 3,3 | 3,5 | 3,2 | ZiK  3,6 | 3,2 | ZiK  3,8 | | ZiK  3,7 | 3,2 | 2,7 | 3,3 | ZiK  4,0 | 4,0 | ZiK  4,0 |
| Tracerdiagnose: Respirationstrakt | Anteil an Patienten mit CAP, bei denen Vitalwerte incl. SpO2 gemessen wurde  [36] (ID_072) | STÄRKEN ÜBERWIEGEN | | | | | | | | | | | | | | PRÄZISIERUNG  Empfehlung für die Formulierung: Anteil der Patienten bei denen Atemfrequenz, Herzfrequenz, SpO2, Blutdruck und Schmerzen dokumentiert sind unter allen Patienten die sich mit den GPCL-Präsentationssymptomen 651 (Luftnot), 653 (Husten, Verschleimung), 658 (Stridor), 659 (Giemen ohne weitere Beschwerden) 661 (grippeähnliche Erkrankungen), 852 (Fieber), 004 (Brustschmerz nicht kardial) 007 (allgemeine Schwäche) vorstellen (n = 5) | |
| 3,5 | 3,6 | 3,2 | 3,9 | 2,9 | ZiK  3,9 | | ZiK  3,9 | ZiK  3,8 | 3,7 | ZiK  3,7 | ZiK  4,0 | ZiK  4,0 | ZiK  4,0 |
| Tracerdiagnose: Akute zentrale Neurologie | Zeitdauer bis Lyse bei Indikation ≤ 60min  [31] (ID_164) | STÄRKEN ÜBERWIEGEN | | | | | | | | | | | | | | MODIFIKATION  Konsens findet die Formulierung: Intervall von Erstkontakt bis Beginn der Maßnahme (systemische Thrombolyse) bei allen Patienten die eine Lyse in der Notaufnahme erhalten (n = 10). | |
| 3,8 | 3,8 | 2,8 | 3,8 | 3,4 | ZiK  3,9 | | ZiK  3,6 | 3,0 | 3,1 | ZiK  3,9 | 3,8 | ZiK  4,0 | ZiK  4,0 |
|  | Zeit von Eintreffen des Patienten bis Übergabe an das Interventionsteam im Falle einer Katheterrekanalisation (ID_179) | STÄRKEN ÜBERWIEGEN | | | | | | | | | | | | | | PRÄZISIERUNG  Konsens findet die Formulierung: Erstkontakt bis Beginn der Maßnahme (Punktion zur neuroradiologischen Katheterintervention) bei allen Patienten die eine neuroradiologische Katheterintervention erhalten. (n = 10) | |
| 3,7 | ZiK  3,7 | 3,0 | ZiK  3,6 | 2,9 | ZiK  3,9 | | 3,2 | 3,2 | 3,5 | 3,1 | 3,8 | 3,8 | 3,8 |
| Abschlussbetrachtung | |  |  |  |  |  |  | |  |  |  |  |  |  |  |  |  |
| Mortalität | Letalität in der Notaufnahme [29, 30, 31, 38, 39, 40] (ID_045) | STÄRKEN MIT PUNKTUELLEN SCHWÄCHEN | | | | | | | | | | | | | | MODIFIKATION  Konsens findet die Empfehlung die 48h-Letalität aller über die Notaufnahme stationär aufgenommenen Patienten zu erheben.  Zusätzlich wird empfohlen, alle verstorbenen Patienten in einer Morbititäts- und Mortalitätskonferenz zu betrachten (n = 18). | |
| 3,4 | 3,2 | 3,0 | ZiK  3,7 | 3,1 | 3,6 | | 2,5 | ZiK  3,9 | 3,0 | 3,8 | ZiK  4,0 | ZiK  4,0 | ZiK  4,0 |
| Patientensicherheit | Prävalenz verhinderbarer unerwünschter Ereignisse  [15, 24, 29, 38] (ID_086) | SCHWÄCHEN MIT PUNKTUELLEN STÄRKEN | | | | | | | | | | | | | | BEDENKEN  In der aktuellen Definition relevant, aber nicht messbar.  (n = 26). | |
| ZiK  3,9 | ZiK  3,8 | 2,7 | 2,7 | 3,2 | ZiK  3,9 | | 3,0 | 1,9 | 3,1 | BiK  1,6 | 2,0 | 1,7 | 1,8 |
|  | Peer review für Fehlermanagement [15, 24, 29, 38] (ID_057) | STÄRKEN MIT PUNKTUELLEN SCHWÄCHEN | | | | | | | | | | | | | | MODIFIKATION  Konsens findet die Formulierung: Anzahl der CIRS Meldungen aus der Notaufnahme pro 1000 Patientenkontakte (n = 4) | |
| 3,5 | ZiK  3,5 | 3,3 | ZiK  3,5 | 3,1 | ZiK  3,8 | | 3,7 | 2,9 | 3,5 | 3,1 | 3,8 | 3,7 | 3,7 |
| Patientenzufriedenheit | Anteil zufriedener Patienten  [10, 38] (ID_054) | SCHWÄCHEN ÜBERWIEGEN | | | | | | | | | | | | | | BEDENKEN  Grundsätzlich wird empfohlen ein System zur Bestimmung der Patientenzufriedenheit vorzuhalten und dies regelmäßig auszuwerten. Als Qualitätsindikator jedoch aktuell aufgrund unterschiedlicher Strukturen und fehlender einheitlicher Messinstrumente nicht weiter operationalisiert. (n = 13) | |
| 3,2 | 2,9 | 2,4 | 3,0 | 3,7 | 3,5 | | 2,8 | BiK  1,3 | 2,4 | 1,9 | 2,3 | 2,8 | 2,5 |
| Sonstiges |  |  |  |  |  |  |  | |  |  |  |  |  |  |  |  |  |
| Mitarbeiterqualifikation | Facharztbehandlung von erwachsenen Patienten die sich wegen Thoraxschmerz ungeplant wiedervorstellen [18, 42] (ID_016) | SCHWÄCHEN ÜBERWIEGEN | | | | | | | | | | | | | | BEDENKEN  Bedenken, da in Deutschland der Facharztstandard bei allen Patienten gilt, nicht erst bei Wiedervorstellungen. Weiterhin bestehen Bedenken da der kritische Fall die Initialbehandlung und nicht die Wiedervorstellung des Patienten ist. In Regionen mit vielen Notaufnahmen ist die Unschärfe zu groß. (n = 9) | |
| 2,9 | 3,3 | 2,7 | 2,5 | 2,6 | 3,4 | | 3,3 | 2,0 | 3,1 | 2,4 | 2,3 | 2,2 | 2,4 |
| Dokumentation | Anteil der Basisbogendokumentation bei der mehr als 10 % fehlen [39] (ID_001) | STÄRKEN MIT PUNKTUELLEN SCHWÄCHEN | | | | | | | | | | | | | | MODIFIKATION  Obwohl eine vollständige Dokumentation allein aus medikolegalen Gesichtspunkten anzustreben und der Informationsweitergabe dient, fehlt bisher die Evidenz, dass sie der Behandlungsqualität förderlich ist. Trotzdem wird empfohlen, den leicht zu messenden Indikator zu verwenden. Als Minimaldatensatz für alle Notaufnahmepatienten werden Zeitstempel der Aufnahmezeitpunkt, Erstkontakt, ärztlicher, Behandlungsabschluss sowie Präsentationssysmptom und Abschlussdiagnose angesehen. (n = 22) | |
| 2,8 | 2,8 | 2,9 | 3,5 | 2,9 | 3,5 | | ZiK  3,9 | 2,9 | 3,7 | 3,0 | 3,8 | 3,8 | 3,3 |
